# Vertical organization of freshwater sediment microbial communities: implications for microbial activities and burial processes

Christian Wurzbacher<sup>a,b,c</sup>, Andrea Fuchs<sup>d,e</sup>, Katrin Attermeyer<sup>a,d,f</sup>, Katharina Frindte<sup>d,g</sup>, Hans-Peter Grossart<sup>d,h</sup>, Michael Hupfer<sup>a</sup>, Peter Casper<sup>d</sup>, Michael T. Monaghan<sup>a,b</sup>

<sup>a</sup>*Leibniz-Institute of Freshwater Ecology and Inland Fisheries, Mueggelseedamm 301, 12587 Berlin, Germany*

<sup>b</sup>*Berlin Center for Genomics in Biodiversity Research, Koenigin-Luise-Str. 6-8, 14195 Berlin, Germany*

<sup>c</sup>*University of Gothenburg, Department of Biological and Environmental Sciences, Box 100, 405 30 Gothenburg, Sweden*

<sup>d</sup>*Leibniz-Institute of Freshwater Ecology and Inland Fisheries, Alte Fischerhuetten 2, 16775 Stechlin, Germany*

<sup>e</sup>*Carl-von-Ossietzky University Oldenburg, Ammerlaender Heerstrasse 114-118, 26129 Oldenburg, Germany*

<sup>f</sup>*Uppsala University, Norbyvaegen 18d, 75236 Uppsala, Sweden*

<sup>g</sup>*Institute of Crop Science and Resource Conservation – Molecular Biology of the Rhizosphere, Bonn University, Nussallee 13, 53115 Bonn, Germany*

<sup>h</sup>*Potsdam University, Institute for Biochemistry and Biology, Maulbeerallee 2, 14469*

---

## Abstract

Microbial activity in lake sediments is essential for cycling of organic matter that continuously sinks from the water column. Its ongoing accumulation and subsequent burial at the sediment surface has unknown implications for the structure and function of microbial communities. We performed a full biogeochemical and microbial community analysis of 4 replicate sediment cores in a clear lake. The 30 cm cores spanned ca. 170 years of accumulation according to <sup>137</sup>Cs dating. Simultaneous DNA-metabarcoding of archaea, bacteria, and eukaryotes delineated three clusters corresponding to three discrete depths (0-5 cm, 5-14 cm, 14-30 cm). Taxa community structure was partitioned into replacement and richness components, and a fuzzy set analysis was used to determine correlates of each component. The two clusters of the upper sediment (covering the last 70 years) were determined by taxonomic replacement and microbial activity, and the replacement component was correlated with

parameters indicative of ongoing biological processes (e.g., protein production). In contrast, the lower cluster was dominated by the richness component correlated with conservative, often historical parameters (e.g., metals). The upper two clusters form an upper horizon termed the "replacement zone" and includes a redox-stratified as well as a transition zone. The lower  $CO_2$  and  $CH_4$  rich horizon, termed the "depauperate zone", was characterized by taxa impoverishment and a dominance of archaea, frequently found in marine systems. Our study uncovered a highly structured microbial community in yet unexplored freshwater sediments. Based on biogeochemical and microbial characteristics, we here propose a general model of freshwater sediment structure and function.

*Keywords:* lake sediment, microbial ecology, archaea, bacteria, eukarya, sediment profile, metabarcoding

## 1. Introduction

The continuous deposition of organic and inorganic particles to sediments is an important process in all aquatic ecosystems. Approximately one-third of the terrestrial organic matter (OM) that enters freshwater is sequestered in sediments [1], although the total amount of OM that reaches the sediments is much greater than the amount that is actually sequestered [2]. This is because microbial activity is responsible for the cycling of carbon, including methane emission [3]. In lake sediments, newly settled OM is rapidly recycled and subsequently transformed into secondary compounds in a distinct uppermost sediment zone of high heterotrophic activity [4, 5]. This is thought to lead to the structuring of microbial communities along steeper environmental gradients and narrower vertical sequences of electron acceptors in freshwater as compared to marine sediments [6], presumably due to the higher OM content at the sediment surface. The nature of this gradient influences the carbon, nitrogen, and sulfur cycles [7, 8, 9] and potentially affects the microbial community structure [10].

In contrast to the wealth of studies on marine sediments (cf. the 65 studies of [11]), few studies have examined the vertical microbial community structure of freshwater sediments (e.g., [12, 13, 14, 15, 16]). This community of sediment microbes was thought to be dominated by bacteria, together with a smaller fraction of methanogenic archaea (reviews in [6, 17, 18]). However, this view has been challenged by the recent discovery of an abundance of

23 non-methanogenic archaea in marine sediments [19]. They are assumed to  
24 be adapted to low-energy environments, and at least one lineage seems to be  
25 specialized in inter alia amino acid turnover [19]. This discovery has led to  
26 a greatly revised perception of microbial communities in marine sediments,  
27 where archaea appear to be as abundant as bacteria and increase in relative  
28 abundance with sediment depth [11]. Data on sediment archaea in freshwater  
29 are scarce, and the causes of the significant variation observed among studies  
30 remain largely unknown (e.g., [14, 20, 21, 22]).

31 Overall prokaryotic activity, biomass, and cell numbers decrease with  
32 depth in many freshwater and marine sediments, even in the uppermost layer  
33 (e.g., [23, 24]). Nonetheless, several studies report similar vertical propor-  
34 tions of active cells and find no accumulation of dead cells in deeper sediments  
35 [5, 25]. Despite the continuous presence of vegetative cells and resting stages,  
36 recent studies of marine systems indicate that the majority of microbial cells  
37 in energy-deprived horizons consist of microbial necromass [26, 27] and the  
38 proportion of living organisms decreases with the increasing age of the sedi-  
39 ment. The vertical, progressive OM transformation and the depletion of elec-  
40 tron acceptors may eventually lead to an extreme low-energy environment in  
41 deeper sediment layers and very slow cell turnover rates, as suggested for sub-  
42 seafloor sediments [28]. One of the basic mechanisms thought to explain the  
43 vertical distribution of microbes is a one-way input of new microbial commu-  
44 nities attached to sinking OM. This leaves us with two simplified, competing  
45 structural models: (i) The sediment community is exclusively colonized from  
46 the surface, thus the community originating from the water column has a  
47 fully nested structure that gradually turns from a complex and rich commu-  
48 nity at the surface to a structure dominated by progressive cell death with  
49 increasing sediment depth. (ii) The sediment community at different depth  
50 layers is structured by niche specialists that are well adapted to the specific  
51 environmental (redox-, OM-, metal-, nutrient-, etc.) conditions (see [29] for  
52 a theoretical framework).

53 The decomposition rate of settled or buried pelagic dead and living organ-  
54 isms can be assumed to depend primarily on the activity of the indigenous  
55 microbial community rather than on other chemical processes (e.g., depurina-  
56 tion; [30]). Thus, the decrease in sediment DNA reported for freshwater sed-  
57 iment profiles (e.g., [31]) is likely to be a result of the degradation of nucleic  
58 acids from dead organisms, particularly eukaryotes, whose biomass strongly  
59 decreases with depth. As a result, the decomposition of buried organisms  
60 should be a function of the active community, and yet these organisms are in

61 a constant transition of becoming buried themselves over time. *Vice versa*,  
 62 varying rates of sedimentation over decades will influence the active microbial  
 63 community by, for example, shifting the redox gradient. It is known these  
 64 changing (historical) lake conditions are recorded in lake sediments both as  
 65 DNA signals and as chemical sediment parameters (e.g., [31]).

66 An important question that remains is how the decomposition processes  
 67 within the sediment redox gradient are related to the burial of OM, eukary-  
 68 otes, and prokaryotes [32, 33]. Here, we provide a complete biogeochem-  
 69 ical and microbial community analysis of a sediment profile of the meso-  
 70 oligotrophic hardwater Lake Stechlin in northeast Germany. Our aims were  
 71 to evaluate (1) the extent to which sediment habitats maintain a one-way  
 72 hierarchical structure, as suggested by the one-way input of organic matter,  
 73 (2) how present and past sediment parameters influence the overall commu-  
 74 nity structure (Box 1), and (3) whether recent novel findings regarding the  
 75 importance and vertical patterns of marine archaea [11] can be transferred  
 76 to freshwater sediments. We took four replicate 30 cm deep sediment cores  
 77 from ca. 30 m water depth.  $^{137}\text{Cs}$  dating indicated the cores include sedi-  
 78 ments deposited over the past 150 to 170 years. We examined the chemical  
 79 conditions and microbial community structure of the cores and simultane-  
 80 ously assessed the vertical community composition of eukaryotes, bacteria,  
 81 and archaea.

**Box 1.** *Definition of "present" and "past" sediment parameters.*

We define *present* parameters as the principal components of all context data derived from a) pore water analysis, which indicates that chemical gradients are caused by the consumption and production of ongoing biological processes (e.g., sulfate and methane), as well as from b) directly measured parameters of microbial activities (e.g., bacterial protein production). The present parameters are therefore an expression of recent microbial processes.

*Past* parameters are the principal components of conservative parameters, which once introduced into the sediments will not change significantly and are therefore an expression of the lake's history (e.g., heavy metals). Here, we also categorize the total amount of elemental carbon, nitrogen, hydrogen, and sulfur as mainly conservative parameters. The past parameters are therefore an expression of historical changes.

## 84 Results

85 The sediment cores were black in color, with no visible lamination, and  
86 they had a high water content (93 – 97%). Macrozoobenthos was visually  
87 absent, and metabarcoding (see below) detected only the presence of nema-  
88 todes (Fig. S1). A consistent pattern across all four sites was the exponential  
89 increase of dissolved refractory carbon with sediment depth (Fluorescence In-  
90 dex  $[FI] = 1.69 - 2.01$ ; Fig. 1), indicating the enrichment of fulvic acids [34].

91 Mean prokaryotic cell numbers were  $1.8 \pm 0.5 \cdot 10^9$  per ml of wet sediment  
92 and were higher in the uppermost sediment horizons. Bacterial biomass  
93 production (BPP) (range: 0 – 282  $\mu g \cdot ml^{-1} d^{-1}$ ) decreased rapidly with  
94 depth, approaching zero below 10 cm. Total DNA concentration (range <  
95 0.3 – 17.6  $\mu g \cdot ml^{-1}$  sediment) decreased exponentially with depth and was  
96 negatively correlated with FI ( $r = -0.886$ ). DNA half-life was inferred to be  
97  $t_{1/2} = 22 a$  (corresponding to 5.4 cm;  $f(DNA) = 13.9 \cdot e^{-0.128x}$ ,  $r^2 = 0.81$ ).  
98 The RNA content of the sediment was lower than DNA at all depths, with  
99 DNA:RNA ratios ranging from 2.3 – 20.8 (Fig. 1). The sediment exhibited a  
100 typical electron acceptor sequence with a mean oxygen penetration depth of  
101 4.6 mm (SD 1.4; Fig. 1). Nitrate and nitrite were depleted rapidly, sulfate  
102 approached a constant minimum concentration after 5 cm, soluble reactive  
103 phosphorous (SRP) and  $NH_4^+$  increased with sediment depth,  $N_2O$  gas was  
104 not detected,  $CH_4$  increased linearly with depth, and  $CO_2$  exhibited minima  
105 at the surface and at a depth of 10 cm (Fig. 1). Detailed vertical resolution  
106 profiles of electron acceptors and profiles of all measured parameters can be  
107 found in the supplemental material (Fig. S2).

108 Using a Chao estimate, the taxa diversity across the 60 samples was es-  
109 timated to be 8545 ( $SE = 173$ ) operational taxonomic units (OTUs). All  
110  $\alpha$ -diversity indices (inverse Simpson, evenness, and estimated Chao index)  
111 decreased with depth. The proportion of sequences that had no close known  
112 relative in the SILVA reference database (< 93% sequence similarity by  
113 BLAST) was highest at 10cm depth ( $40 \pm 4\%$ ). When we summarized the  
114 replicates and analyzed the community matrix globally using a cluster anal-  
115 ysis, the sediment communities were grouped into three major clusters cor-  
116 responding to the depth zones (0 – 5 cm, 5 – 14 cm, and 14 – 30 cm), with  
117 a pronounced separation at 14 cm (Fig. 1). Sediments at 15 – 30 cm depth  
118 were more similar in their community composition (> 65%) than in the up-  
119 per two clusters (< 50%). The community turnover (distance) follows a  
120 distance decay curve with increasing depth, approaching a distance of 1 (i.e.,

Table 1: Jaccard based distance measures for all depths. Distance: total Jaccard based distance to the uppermost depth [0-1 cm]; repl.: replacement component of the Jaccard distance; richness: richness component of the Jaccard distance; LCBDrpl: local contribution of the replacement component; LCBDrich: local contribution of the richness component.

| depth [cm] | distance | repl. | richness | LCBDrpl  | LCBDrich |
|------------|----------|-------|----------|----------|----------|
| 0-1        | NA       | NA    | NA       | 0.083*** | 0.039    |
| 1-2        | 0.683    | 0.600 | 0.083    | 0.086*** | 0.001    |
| 2-3        | 0.668    | 0.662 | 0.006    | 0.068    | 0.050    |
| 3-4        | 0.688    | 0.659 | 0.029    | 0.057    | 0.079    |
| 4-5        | 0.735    | 0.733 | 0.003    | 0.064    | 0.052    |
| 5-6        | 0.739    | 0.709 | 0.030    | 0.070*   | 0.024    |
| 6-7        | 0.761    | 0.722 | 0.040    | 0.069    | 0.019    |
| 7-8        | 0.780    | 0.751 | 0.029    | 0.066    | 0.030    |
| 8-9        | 0.822    | 0.749 | 0.072    | 0.071**  | 0.010    |
| 9-10       | 0.824    | 0.753 | 0.071    | 0.071**  | 0.010    |
| 10-14      | 0.860    | 0.782 | 0.078    | 0.074*** | 0.011    |
| 14-18      | 0.902    | 0.720 | 0.183    | 0.063    | 0.075    |
| 18-22      | 0.920    | 0.715 | 0.206    | 0.061    | 0.113    |
| 22-26      | 0.930    | 0.689 | 0.241    | 0.056    | 0.183    |
| 26-30      | 0.934    | 0.649 | 0.285    | 0.041    | 0.304*   |

no shared taxa) for the lowest sediment layer compared to the surface layer (Table 1). When partitioning the  $\beta$ -diversity among sediment layers into richness and replacement effects, the effect of richness was proportional to increasing depth ( $R^2 = 0.96$ ,  $F = 230.8$ ,  $dF = 11$ , see Fig. S3), but it reached significance only at the deepest sampled layer (26 – 30 cm depth). Taxon turnover/replacement was consistently high and significant for multiple sediment depths within the first 14 cm (Table 1).

The OTUs that were the most influential in shifting the community structure across the 15 sediment depths were identified by calculating the corresponding species contribution to  $\beta$ -diversity (Fig. S4) [35]. The identities of these 96 structuring OTUs indicate an interrelationship of all three domains, with the most influential phyla being Euryarchaeota and Thaumarchaeota in the archaea and Chloroflexi, Proteobacteria, and Phycisphaerae in the bacteria. Redox-dependent groups (13% of the taxa could be clearly assigned to redox processes by their classification, e.g., Nitrospiraceae, Desulfobac-

teraceae, and Methylococcales) and redox irrelevant groups (eukaryotes and e.g., Bacteriovoraceae) structured the vertical microbial community. Out of these 96 structuring OTUs, we identified the OTUs that are significantly elevated in each of the three zones (Fig. 2). While we see eukaryotic and bacterial lineages to be characteristic for the uppermost zone (cluster a in Fig. 1), archaea and bacteria are elevated in the lowest zone (cluster c). For cluster b, only two structuring archaeal OTUs were identified. The residual OTUs from cluster b are significantly elevated either in the upper two clusters (mainly bacteria) or in the lower two clusters (mainly archaea). Out of the structuring OTUs, only one (Methylococcales) was significantly different in all three clusters (Fig. 2).

For a general overview on the median appearance of eukaryotic, bacterial, and archaeal taxa at single depth layers, see Fig. S1. Globally, archaea, bacteria, and eukaryotes all exhibited pronounced vertical changes. Their sequence proportions (A:B:E) shifted from 10:70:20 at 0 *cm* to 50:50:0 at 10 *cm* and 60:40:0 at 30 *cm* depth (Fig. 3A). The eukaryote pattern was correlated with the total DNA concentrations in the sediment ( $r = 0.869$ ), and it decayed exponentially with depth. We were able to predict DNA concentration using a multiple linear regression as a function of the occurrence of eukaryotes (75.6% of the variation) together with bacteria (10.0% of the variation; model:  $R^2 = 0.856, p < 0.001$ , Fig. S5). A multivariate ordination of all the samples confirmed a strong vertical gradient in the community structure, which was reflected in the distance between the surface and deep sediments on axis 1 (Fig. 3B, Mantel correlation:  $r = 0.735, p < 0.001$ ). We were able to significantly recover the three depth zones (Fig. 3B, PERMANOVA:  $F = 12.3, p = 0.0005$ ), and there was an obvious reduced variance in cluster c compared to the other clusters (betadispersal analysis: Tukey's Honest Significant Differences between groups,  $p < 0.01$ ), confirming the higher similarities seen in the previous cluster analysis. The overall community structure was correlated with both present (Mantel correlation:  $r = 0.527, p < 0.001$ ) and past ( $r = 0.459, p < 0.001$ ) parameters, which were nearly orthogonal in ordination. To elucidate this further, we investigated whether the past parameters may match with the richness component of the community composition, and correspondingly, whether the present parameters are correlated to the replacement component of the microbial community. Thus, we partitioned the whole dataset into replacement and richness matrices and correlated these to the present and past parameters by employing a fuzzy set analysis. The richness community submatrix was strongly correlated with



the past parameters (two-dimensional fuzzy set ordination with the first 2 axis of the PCA,  $r = 0.99$ ). The replacement community submatrix was correlated with the present parameters (one-dimensional fuzzy set ordination with the first axis of the PCA,  $r = 0.65, p < 0.001$ ).

## Discussion

Comprehensive studies of the microbial communities and physic-chemical characteristics of freshwater sediments are scarce, and general concepts are often transferred from marine systems without validation. Often salinity and significant higher sulfate concentrations are responsible for major differences between both systems [36, 37]), which may lead to major differences between the two systems. We address fundamental questions regarding the structure and organization of freshwater sediments and establish a structural model that can potentially be applied to other aquatic sediments.

### 1.1. Organization of freshwater sediments

Although constant microbial colonization of surface sediments occurs via sinking OM, the sediment habitat is considered to be an autonomous system in terms of species diversity and community structure [17, 18], with the exception of surface supply of planktonic OM, including decaying eukaryotes (Fig. S4). Indications that a high species turnover, as suggested by our results, may be a common feature of vertical sediment profiles have been reported for bacterial taxa in coastal marine sediments [38], for marine archaea and bacteria [39], and for freshwater archaea [20]. Previous freshwater sediment studies that found a more moderate species turnover were restricted by the use of low-resolution methods [40, 20, 15]. Moreover, most studies have focused on either bacteria or archaea and not on all three domains simultaneously, and none of the previous marine or freshwater studies partitioned  $\beta$ -diversity into richness and replacement components, which allowed us to look at both buried and active taxonomic signals.

Our results pointed to three depth clusters. Based on the high replacement (Table 1) and measurable microbial production in the first two depth clusters (cluster a, b) (Fig. 1), we decided to classify them into one overarching horizon, which we called the replacement horizon. Correspondingly, we classified the lowest depth cluster (cluster c) into the depauperate horizon, based on the loss in richness measures and constancy in most sediment parameters (Box 2).



**Box 2.** *Sediment zonation according to taxonomic clustering, -partitioning, and context data.*

- I. The replacement horizon ( $1 - 14\text{ cm} | ca. 0 - 60\text{ a}$ ) is subdivided into two zones, delineated by the sulfate-methane transition, which falls approximately within or correlates with a local prokaryotic cell maximum.
  - Cluster a) redox-stratified zone ( $0 - 5\text{ cm} | ca. 0 - 20\text{ a}$ ). This zone encompasses the redox-stratified zone and the typical sequence of electron acceptors from oxygen to sulfate.  $NH_4^+$  and SRP increases. It is characterized by high microbial activity, cell numbers, taxa turnover, spatial variability, low DNA:RNA ratios, and low FI values ( $1.7 - 1.8$ ). Potentially 50% of the sedimented organic matter is metabolized in this horizon, aligning with the rapid decrease of eukaryotes. Bacteria dominate this horizon.
  - Cluster b) transition zone ( $5 - 14\text{ cm} | ca. 20 - 60\text{ a}$ ). This zone is characterized by strong gradients. Microbial cell numbers drop off and activity decreases, diversity decreases, the taxa turnover stays high, the DNA:RNA ratio doubles, and FI values increase ( $1.8 - 1.9$ ). Methane concentrations rise, and  $CO_2$  has a local minimum. Potentially, another 35% of the sediment organic matter is turned over in this horizon. Eukaryotes approach zero, bacteria decline, and archaea rise rapidly in their community contribution. Here, we also see a maximum of taxa with no close relatives to known database entries.
- II. The depauperate horizon ( $14 - x\text{ cm} | ca. > 60\text{ a}$ ) is very distinct from horizon I, and it is unclear how far this horizon reaches. It appears to be archaea-dominated and is characterized by a loss in richness and a shift toward the dominance of single taxa.
  - Cluster c) ( $14 - 30\text{ cm} | ca. 60 - 150\text{ a}$ ). The horizon is characterized by constancy in most parameters, while we see significant taxon richness effects and marked drops in spatial variability, evenness, and diversity. Cell numbers and activity stay consistently low, while DNA:RNA ratios and FI values ( $2.0$ ) stay consistently high.  $CH_4$  and  $CO_2$  approach saturation. Archaea are dominant.

209

210 *The replacement horizon.* Bacterial activity was highest in the redox-stratified  
 211 zone (cluster a), which is where most of the settled OM is available. As sul-  
 212 fate is depleted at  $5\text{ cm}$  depth, most redox processes will take place above  
 213 this. The majority of freshwater sediment studies examine this zone in great

214 detail (e.g., [4, 5, 10]), including the identification of redox processes at the  
 215 millimeter scale [41, 42]. Highly active decomposition processes lead to high  
 216 prokaryotic cell numbers close to the sediment surface (our data) or at the  
 217 sediment surface (e.g., [5, 24, 43], as well as a constantly lower abundance in  
 218 deeper horizons [15]. There was also an initial loss of many taxa in the highly  
 219 active oxycline –indicated in our data by an outlier to the richness commu-  
 220 nity component (Fig. S3)– which was potentially intensified by active grazing  
 221 through, for example, ciliates and copepods. The sulfate-methane transition  
 222 marks the border of the transition zone (cluster b). This border can harbor  
 223 important methane oxidation processes [44], and in our data, it coincided  
 224 with a small maximum of prokaryotic cells. At 10 *cm*, the  $CO_2$  minima  
 225 might indicate the beginning of hydrogenotrophic methanogenesis (Fig. 1).  
 226 [45] described this pathway for profundal Lake Stechlin sediments. In this  
 227 second subzone, the archaeal contribution rises constantly, while bacteria and  
 228 eukaryotes decrease and the general activity measures decline rapidly. As in-  
 229 dicated by the DNA measurements, more than 85% of the settled organisms  
 230 were decomposed within this replacement horizon, which spanned approxi-  
 231 mately 60 years. The decay of DNA, in combination with an enrichment of  
 232 fulvic acids with increasing depth (FI values), confirms the assumption that  
 233 DNA can serve as a proxy for the buried OM. Thus, there is not only a gra-  
 234 dient of electron acceptors in the replacement horizon but also a gradient of  
 235 OM quality. This might again facilitate the stratification of active microbial  
 236 taxa with depth since OM can simultaneously serve as an electron donor and  
 237 acceptor [46, 47] and because OM quality is known to modulate microbial  
 238 redox processes [48], with apparent consequences for carbon turnover rates  
 239 [47, 33].

240 *The depauperate zone.* This horizon (cluster c, > 14 *cm*) is fairly distinct in  
 241 many parameters; it features high methane and  $CO_2$  concentrations, a dom-  
 242 inance of archaea, and richness impoverishment. In this zone, the theoretical  
 243 model of a hierarchical, nested system is clarified (9% vs. 2% relative nest-  
 244 edness in the replacement horizon). At 14 *cm*, the DNA:RNA ratio doubled  
 245 and archaea replaced bacteria as the dominant microorganisms. We believe  
 246 this reflects an increase in the number of microbes entering a stationary state  
 247 below this depth, where cell maintenance overrules cell synthesis due to the  
 248 low availability of terminal electron acceptors. This is analogous to what has  
 249 been suggested for cells in low-energy marine environments [26, 28, 49].

250 The variability in community composition is very low across replicates in

251 this horizon. The system is characterized by the gradual disappearance of  
 252 taxa with burying age and a richness component steadily increasing to more  
 253 than 20% (Table 1). If the richness component further increased linearly, it  
 254 would be the sole factor in structuring the community composition in 1 *m*  
 255 sediment depth (the total sediment depth of Lake Stechlin is 6 *m*). It is  
 256 intuitive that the richness component may be a function of the burying time  
 257 and that it represents the fading signal of preserved organisms. However,  
 258 it is not clear why it does not follow an exponential decay function that is  
 259 analogous to that for DNA.

260 *Potential causes of the high taxa replacement.* In our study, many paramet-  
 261 ters changed rapidly, especially in the replacement horizon (DNA, FI, BPP,  
 262 electron acceptors), propagating microbial taxa turnover. This could be po-  
 263 tentially caused by several different mechanisms: **a)** Cellular turnover: taxa  
 264 replacement is potentially caused by cell synthesis, viral lysis, and recycling of  
 265 dormant cells, which are assumed to be high in sediments [50, 51]. Although  
 266 we have not assessed the viral abundances, viral lysis of cells is supposed to  
 267 be very important in sediments [52, 53]. We found indications for cellular  
 268 recycling caused by the predatory Bacterioviraceae (cf. [54]), which is one  
 269 of the structuring bacterial lineages identified in Fig. S4. Another potential  
 270 mechanism –one that may be most important in the depauperate zone– is  
 271 differential cell replication. The resources for cell maintenance and growth  
 272 should depend on cell size and complexity, which means that small cells, such  
 273 as nanoarchaea (Candidatus Parvarchaeum, Fig. 2), should have a selective  
 274 advantage as they can continue to grow under conditions that cause other  
 275 cells to switch to cell maintenance. This could be one explanation for the  
 276 observed drop in evenness in the depauperate zone. **b)** Random appearances:  
 277 Replacement might also be caused by the random appearance of taxa due  
 278 to the disappearance of others. Since high-throughput sequencing (HTS)  
 279 produces relative data, it may superimpose proportions over quantities. For  
 280 example, the initial decay of eukaryotes may have opened a niche for pre-  
 281 viously hidden rare taxa. Further, if there was no growth in the sediment,  
 282 lineages that are potentially better suited for long-term survival than oth-  
 283 ers would appear, such as spore-forming bacteria (Firmicutes). However, we  
 284 (and others: [26, 31]) did not observe an enrichment of this lineage in the  
 285 HTS data with depth (data not shown). In addition, the use of replicate  
 286 cores in combination with our conservative stripping (see the Method sec-  
 287 tion) should have removed most of the random effects. The small local cell

maximum at the sulfate-methane transition, the otherwise constant cell numbers, and the observed shifts in the evenness support a rather non-random stratification of sediment communities including cell replication. While the cellular reproduction probably approaches stagnation for most microbes in the depauperate horizon, the slowly shifting redox conditions during different seasons and across years may be conducive for the colonization of the replacement horizon by different niche specialists. The low sedimentation rate of Lake Stechlin (ca. 2 mm per year, as determined by  $^{137}\text{Cs}$ -dating at the Federal Office for Radiation Protection, Berlin [courtesy of U.-K. Schkade], or  $0.4 - 2.1 \text{ g} \cdot \text{m}^{-2} \cdot \text{d}^{-1}$ , as determined by sediment traps [55]) may mitigate this stratification, and the scale of the horizons may look different in systems with higher or lower sedimentation rates.

### *Burial processes and microbial activities*

The microbial sediment community appears to be highly indigenous, yet burial processes take place simultaneously, and the microbial community itself may eventually be buried. The buried DNA and organisms seem to preserve historical plankton communities, which should resemble the past conditions of the lake ecosystem [56, 31, 57]. These past environmental conditions are partly preserved as particulate matter, which is relatively conservative. We were able to show that these conservative past parameters still correlate with the overall community. Although past studies have shown that sediment parameters influence community patterns in marine systems [39], the respective context data were not separated into present and past, nor was the microbial community separated into richness and replacement components. In this context, it is interesting that the richness component can be well explained by the first two principal components of the past parameters. Since the replacement component could not be fully mapped by the present parameters in our study, we can assume that sources of variation other than environmental parameters, in particular, biotic taxa interactions, are relevant. Strong biotic interactions have been identified in a vertical profile of a meromictic lake with a comparable chain of redox processes as they occur in sediments [58]. Deep sediment layers may offer specific energy-poor microniches favoring a high variety of syntrophic microorganisms [59, 60]. The Dehalococcoidales (Chlorflexi [61, 62]) and the Miscellaneous Crenarchaeotic Group (MCG, [63, 64]) are promising candidates for such hybrid forms of energy harvesting and are both among the most influential lineages in our data (Fig. S4). In our data, the MCG co-occur with Dehalococ-

coidales, similar to their presence in Lake Baikal's ( $> 1500$  m water depth) methane hydrate-bearing sediment [65]. Another indication that biotic interactions are important in Lake Stechlin sediments is the appearance of the Candidatus Parvarchaeum as a structuring lineage (Fig. 2). These cells are ultra-small symbiotic nanoarchaea that exhibit a cell-to-cell coupling and allow for thermodynamic processes that would otherwise not be possible [66].

### 331 *Patterns of freshwater archaea*

332 The fact that archaea can be very numerous in freshwater sediments and  
 333 even dominate microbial communities is a rather new discovery, and hard  
 334 facts based on comparative studies are still lacking. Their recovery rate in  
 335 relation to bacterial sequences or cell numbers varies between 3 – 12% ([67],  
 336 cells), 5 – 18% ([20], qPCR), and 14 – 96% ([14], qPCR), depending on the  
 337 lake, sampled sediment horizons, and methods employed. In most cases, only  
 338 surface sediment samples have been considered (e.g., [68], 1% of cells), and  
 339 the few studies involving vertical profiling to date are ambiguous in finding  
 340 an archaeal depth gradient. Our results and the cell counts of [67] in Lake  
 341 Biwa (Japan) point to an increase in the proportion of archaea with sediment  
 342 depth. However, the results obtained by quantitative PCR for Lake Taihu  
 343 (China; [14]) and Lake Pavin (France; [20]) fail to show such a relationship.  
 344 Archaea have, on average, compact genomes [69] and a lower ribosomal copy  
 345 number than bacteria [70], which may lead to underestimates of the actual  
 346 archaeal abundance. Similar to our results, [20] found three sequential depth  
 347 clusters in the archaeal community structure within the first 40 cm, defin-  
 348 ing an intermediate layer between 4 and 12 cm. Next to well described  
 349 methanogenic archaea we, similar to the findings of [20], mainly recovered  
 350 archaeal lineages with no clear functional assignment thus far, i.e., primarily  
 351 the MCG (potentially methanogenic, [64]) and the Marine Benthic Group D  
 352 (MBG-D). Both groups are among the most numerous archaea in the marine  
 353 sub-seafloor, and they are suspected to metabolize detrital proteins ([19],  
 354 discussed in more detail below). Interestingly, we also identified a MCG-B  
 355 as structuring OTU for the transition zone 2, a group which was recently de-  
 356 scribed as eukaryotic progenitor from a hydrothermal vent (Lokiarchaeota,  
 357 [71]). Also, several MCG OTUs belonged to the top structuring taxa. MCG  
 358 was recently named as Bathyarchaeota by [72] for its deep-branching phy-  
 359 logeny and its occurrence in deep subsurface environments –environmental  
 360 conditions that our cores (30 m water depth and 30 cm length) did not meet.  
 361 Our results suggest that the specific niche adaptation of these microbes is

not necessarily related or restricted to the deep biosphere but rather to a cellular state of low activity [73]. In this context, it is interesting that single MCG OTU sometimes dominated the community in the deep horizons (up to 34% in core D at 26 – 30 cm), resulting in a reduced overall evenness and a shift of the residual taxa to the rare biosphere, contrasting the potential random effects as discussed above. Another intriguing observation is the considerable overlap of archaeal and partially bacterial lineages between our study and deep-sea environments. Consequently, typical marine lineages (e.g., archaea in Fig. S1: MGI, MCG [Bathyarchaeota], MHVG, DHVEG-1, -6 [Woese archaeota], DSEG, MBG-A, -B [Lokiarchaeota], -D, -E) are not as marine or as deep-sea as previously thought. Given the high cost of deep-sea research [28], freshwater sediments might literally pose a row-boat alternative for research questions targeting these remote and extremophile microorganisms.

## Summary and Conclusions

Our results point toward a steady-state chemostat-like environment with a highly stratified indigenous microbial community in freshwater sediments. Sediments are neither a one-way system for the burial of organic matter nor purely composed of redox-active microorganisms. Both processes take place alongside a vertical gradient of electron acceptors and decomposing OM of decreasing quality. The microbial community is highly structured into distinct zones, matching most sediment parameters. Both the microbial community and the sediment parameters can be divided into components relevant for burial and past conditions as well as for recent carbon turnover processes and their context data. Biotic interactions are likely to play an important role, and we were able to identify important sediment taxa for each horizon. We put a spotlight on the largely unexplored freshwater sediments and confirmed earlier findings that were previously described only for marine sediments, such as the importance of marine archaeal lineages and the introduction of a depauperation zone in which the burial process becomes increasingly important.

## 2. Material and Methods

### *Sampling site and sampling procedures*

Lake Stechlin (latitude 5310 N, longitude 1302 E) is a dimictic meso-oligotrophic lake (maximum depth 69.5 m; area 4.23 km<sup>2</sup>) in northern Ger-



many that has been the subject of more than 55 years of research ([74]). Sediment cores were extracted from the southern bay of the lake. Four adjacent sites were sampled to account for spatial heterogeneity in the sediment (Sites A-D, Fig. S6). Pore water was collected by four in-situ dialysis samplers, so-called peepers ([75]), which were deployed for 14 days using a frame ( $1\text{ m}^2$ ). Shortly before retrieving the peepers, four sediment cores were taken from each site with Perspex tubes (inner diameter: 6 or 9 cm; length: 60 cm) using gravity corers (UWITEC<sup>TM</sup>, Mondsee, Austria) at 30 m water depth (aphotic depth) on two subsequent days (March 26 and 28, 2012; peepers were retrieved on April 1, 2012). Two sediment cores (6 cm diameter) were stored in the dark at 4C until oxygen penetration depth was measured within the next 4 hours (see below). The sediments of the 9 cm cores were sliced directly into 1 cm layers for the uppermost 10 cm, then in 4 cm layers for sediment depths of 10–30 cm. One core was used for the analysis of the total sediment and the other was used for pore water, gas, and microbial analyses (see below). In May 2014, 24 additional cores were taken to determine the age-depth correlation using the cesium 137 technique.

#### Maximum oxygen penetration depth

Two initial cores were carefully transferred into 20 cm short cores without disturbing the sediment surface. The short cores were kept cool (4C) until measurements were taken. Oxygen microprofiles were performed using two Clark-type microelectrodes (OX50 oxygen microsensors, Unisense, Aarhus, Denmark) with a 50  $\mu\text{m}$  glass tip. SensorTracePro 2.0 software (Unisense) was used for data storage. The electrodes were calibrated by two-point calibration. For each core, we measured at least four profiles. The sediment-water interface was defined as the point where the oxygen depletion shifted from linear to non-linear ([76]).

#### Pore water analysis

The sampled sediment horizons were centrifuged (13,250 g for 10 min) to retrieve pore water (filtered through rinsed 0.45  $\mu\text{m}$  cellulose acetate membranes, Roth, Germany) for immediate analysis of the dissolved organic carbon (DOC) and FI. DOC was measured as non-purgeable organic carbon with an organic carbon analyzer (multi N/C 3100, Analytic Jena AG, Jena, Germany). FI was measured following the protocol of [34]. Peeper samples were analyzed for concentrations of SRP and ammonium ( $\text{NH}_4^+$ ), dissolved



iron ( $Fe^{2+/3+}$ ), manganese ( $Mn^{2+}$ ), chloride ( $Cl^{-}$ ), nitrate ( $NO_3^{-}$ ), and sulfate ( $SO_4^{2-}$ ), following DIN EN ISO 10304-1. SRP and  $NH_4^{+}$  were photometrically determined using a segmented flow analysis (SFA, Skalar Sanplus, Skalar Analytical B.V., De Breda, Netherlands). Dissolved iron and manganese levels were determined by AAS (Perkin Elmer 3300, Rodgau-Juegesheim, Germany), and analyses of the dissolved anions nitrate and sulfate were conducted by ion chromatography (IC, Shimadzu Corporation, Japan).

#### 440 *Total sediment analysis*

441 Sediment water content was analyzed by drying at 85C until mass was  
442 constant. A subsample was used to determine the organic matter content (4 h  
443 at 550C) of the sediment. The metal concentrations were determined by ICP-  
444 OES (iCAP 6000, Thermo Fisher Scientific, Dreieich, Germany) after aqua  
445 regia digestion in a microwave oven (Gigatherm, Grub, Switzerland), and  
446 total phosphorus (TP) was determined by CARY 1E (Varian Deutschland  
447 GmbH, Darmstadt, Germany) after  $H_2SO_4/H_2O_2$  digestion (150C, 16 h).  
448 CNHS content was determined using aliquots of dried matter in a vario EL  
449 system (Elementar Analysensysteme GmbH, Hanau, Germany).

#### 450 *Gas chromatography*

451 From each depth, 2 ml of sediment was transferred into 10 ml vials filled  
452 with 4 ml of distilled water. Samples were fixed with mercury chloride (final  
453 conc. 200  $mg\ l^{-1}$ ), sealed, and stored in the dark at 4C until analysis. Con-  
454 centrations of  $CO_2$ ,  $CH_4$ , and  $N_2O$  were measured by gas chromatography  
455 (Shimadzu GC-14B, Kyoto, Japan) using the headspace technique described  
456 in [77].

#### 457 *Bacterial protein production*

458 Bacterial biomass production was determined via  $^{14}C$  leucine incorpora-  
459 tion at in situ temperature under anoxic conditions [78] using a modified pro-  
460 tocol [79]. 500  $\mu l$  of sediment was diluted 1:1 with sterile filtered supernatant  
461 water and incubated with  $^{14}C$ -leucine (Hartmann Analytics, Braunschweig,  
462 Germany; specific activity: 306  $mCi\ mmol^{-1}$ , diluted with cold L-leucine to  
463 a final concentration of 50  $\mu mol\ l^{-1}$ ). Incubations were stopped after 1 h,  
464 extracted, and measured in a liquid scintillation analyzer (TriCarb 2810 TR,  
465 PerkinElmer Inc., Germany). Disintegrations per minute were converted to  
466 pmol leucine  $ml^{-1}day^{-1}$ , assuming a two-fold intracellular isotope dilution  
467 [80, 81].

## 468 *Cell counting*

469 Sediment subsamples for cell counting were immediately fixed with ethanol  
470 (50% v/v final concentration). Prior to analysis, samples were shaken for 1  
471 h at 700 rpm on a thermoshaker and were sonicated three times for 20s at  
472 5 – 6W (Branson Sonifier 150, Danbury, USA). Cells were stained with a  
473 SYBR Gold staining solution diluted to 1:1,000 (Molecular Probes, Eugene,  
474 USA) and were counted with an epifluorescence microscope (Zeiss, Axio Im-  
475 ager. Z1, Jena, Germany).

## 476 *Nucleic acid extraction and sequencing*

477 To determine the DNA:RNA ratio, we extracted total nucleic acids us-  
478 ing a phenol-chloroform protocol from 200 – 400  $\mu$ l sediment, as described  
479 by [82]. The DNA:RNA ratio was measured via fluorometry using selec-  
480 tively binding dyes (Broad range dsDNA and broad range RNA assay Kit,  
481 Life technologies, Darmstadt, Germany) developed for the Qubit 2.0 (Life  
482 technologies, Darmstadt, Germany). A second extraction served as template  
483 for the sequencing and determination of the total DNA content. A defined  
484 sediment subsample (350 $\mu$ l) from each depth was lyophilized prior to DNA  
485 extraction. We used the Alternative Protocol for Maximum DNA yields of  
486 the UltraClean Soil DNA Isolation Kit (MoBio Laboratories Inc., Carlsbad,  
487 USA). The quality of the DNA and the presence of putative environmental  
488 (small) DNA in 12 representative samples from 12 depths were verified with  
489 a microgel electrophoresis system (DNA High Sensitivity Kit, Bioanalyzer,  
490 Agilent, USA, see Fig. S7). A total of 5 – 20 ng of DNA, as measured by  
491 NanoPhotometer P300 (Implen, Schatzbogen, Germany), served as the tem-  
492 plate for PCR amplification (Herculase II system, Life Technologies) using a  
493 single universal primer system (926F, 1392R, [83]). The primer pair employed  
494 is one important feature of our study in that it detects all three microbial  
495 domains (archaea, bacteria, and eukaryotes) in freshwater systems [58, 84].  
496 PCR products were purified with AMPure Beads (Beckmann Coulter, Brea,  
497 USA) and quantified and pooled using a PicoGreen assay (Life Technologies,  
498 Carlsbad, USA). High-throughput sequencing was performed in a Roche 454  
499 GS Junior benchtop sequencer (Hoffmann-La Roche, Basel, Switzerland) at  
500 the Berlin Center for Genomics in Biodiversity Research. Raw sequence data  
501 were deposited in ENA (accession PRJEB14189).

## 502 *Data processing*

503 454 sequencing data were processed using Mothur (version 1.33.0) fol-  
 504 lowing the guidelines of the Mothur SOP ([http://www.mothur.org/wiki/](http://www.mothur.org/wiki/454_SOP)  
 505 454\_SOP, accessed 02/2014) with the following modifications: (i) for qual-  
 506 ity trimming, we used a sliding window approach with a relaxed threshold  
 507 (window size: 50, quality cut-off: 27), and (ii) the alignment step used SINA  
 508 (version 1.2.11; [85]) against the SILVA v.111 non-redundant SSU reference  
 509 database. A total of 396,000 reads (49% of raw sequences) were retained.  
 510 The sequences were clustered into OTUs at 97% sequence similarity. A rep-  
 511 resentative sequence from each OTU was used for taxonomic classification  
 512 with the least common ancestor method in SINA, using 0.7 as a setting for  
 513 minimum similarity as well as for lca-quorum. The classified OTU abun-  
 514 dance matrix served as the basis for all subsequent statistical analyses. The  
 515 percentage of sequences with low similarity (< 93%) to the next reference  
 516 sequence was determined by submitting the fasta files to SILVA NGS [86].

## 517 *Statistics*

518 All measured environmental parameters were compiled in a matrix and  
 519 imported into R (<http://cran.r-project.org/>, version 3.2.2). We re-  
 520 placed two outliers (FI: replicate 4 *cm*, total phosphorous: replicate 14 *cm*)  
 521 with the mean values of the three other sediment cores. For statistical analy-  
 522 sis, the relative proportions of archaea, bacteria, and eukaryotes were arc-sin  
 523 transformed. For the multiple regression analysis on the declining DNA con-  
 524 centrations, we removed one value (replicate 3, 22 *cm*) to meet the normal  
 525 distribution criteria of the residuals. Sufficient normal distribution was con-  
 526 firmed by a QQ plot and Shapiro-Wilks test,  $p = 0.183$ ; Cook's distance was  
 527 not violated in any case. We categorized the environmental parameters into  
 528 present ( $CH_4$ ,  $CO_2$ , DOC, BPP, SRP,  $NH_4^+$ ,  $SO_4^{2-}$ ,  $Cl^-$ ,  $Fe^{2+/3+}$ ,  $Mn^{2+}$ ,  
 529 FI, and RNA:DNA) and past (TC, TN, dry-weight, TP, TS, TH, Al, As,  
 530 Ca, Cu, Fe, Mg, Mn, Pb, Ti, and Zn) (see Box 1) and assessed the sample  
 531 variation for each subset by a centered, scaled principal component analysis  
 532 (PCA, see Fig. S8). The resulting most explanatory PCA axes, which ex-  
 533 plained 54% (present parameters) and 41% (past parameters) of the sample  
 534 variation, were used in the community statistics (see below). DNA and cell  
 535 numbers were not categorized due to their ambiguous nature; Al was used as  
 536 a substitute for Mg and Ti due to their high degree of correlation ( $r > 0.95$ );  
 537  $N_2O$ ,  $NO_3^-$ , Cd, and Co were excluded due to their very low values, i.e., near  
 538 or below the detection limit in all the samples.

### 539 *Community statistics*

540 Random effects were initially excluded from the OTU matrix by removing  
 541 all OTUs present in only one sample, regardless of the number of reads. The  
 542 random effects are expected to be very high in sediments due to the burial  
 543 of random organic matter (e.g., caused by the droppings of a bird, tourist  
 544 activities, rainfall) and thus a large amount of rare taxa. This reduced the  
 545 number of OTUs from 29,228 to 9,581 but did not influence the sample  
 546 distances (Mantel test with Hellinger distances:  $r = 0.993, p < 0.001$ ). Di-  
 547 versity indices were calculated using the vegan package [87] for R, with a  
 548 community matrix that was rarefied to the lowest number of reads (642)  
 549 present in a sample. The rarefied matrix was highly correlated to the initial  
 550 matrix (Mantel test with Hellinger distances:  $r = 0.923, p < 0.001$ ). Non-  
 551 metric multidimensional scaling (NMDS) and Mantel tests were based on  
 552 a Hellinger-transformed OTU matrix with Euclidean distances. The PCA  
 553 scores from the past and present parameters (see Box 1) were fitted into  
 554 the NMDS, and their correlation with the underlying distance matrix was  
 555 tested with a Mantel test. We used a fuzzy set ordination [88] to test for the  
 556 influence of the past and present parameters on the separated richness and  
 557 replacement community components. For this, we partitioned  $\beta$ -diversity  
 558 into richness and replacement components using indices from the Jaccard  
 559 family, following [89] and the functions provided by [35]. In order to identify  
 560 general vertical patterns, we used a sum table to increase the resolution and  
 561 thus avoid an artificial increase in turnover versus the richness/nestedness  
 562 structure due to sampling effects. The sum table was generated by summing  
 563 up 2,000 sequences per depth, if applicable. The final sum table was rarefied  
 564 to the lowest number of sequences in the depth profile (5,987 reads). The  
 565 cluster analysis (UPGMA clustering based on Kulczynski distance, Fig. 1)  
 566 was also done on the sum table. The depth-dependent nestedness [29], rich-  
 567 ness component, replacement component, SCBD, and LCBD were calculated  
 568 as described in [35]. We note that the nestedness index [29] is dependent on  
 569 the sample size, and so we refer to it as relative nestedness.

### 570 **Acknowledgments**

571 We thank Michael Sachtleben and Federica Pinto for their help during  
 572 sampling. We also thank Elke Mach, Uta Mallok, Christiane Herzog, Hans-  
 573 Jrgen Exner, Grit Siegert, Susan Mbedi, Kirsten Richter, Camila Mazzoni  
 574 and Andreas Kleeberg for their assistance and measurements in the labo-

575 ratory and Henrik R. Nilsson for comments on this manuscript. This is  
576 publication 40 of the Berlin Center for Genomics in Biodiversity Research.  
577 This work was funded by the Leibniz Association Pakt for Research and  
578 Innovation project Climate-driven changes in biodiversity of microbiota -  
579 TemBi (SAW-2011-IGB-2) and DFG GR1540/15-1 and 23-1. We thank U.-  
580 W. Schkade (Federal Office for Radiation Protection, Berlin, Germany) for  
581 the dating of the Lake Stechlin sediments.

## 582 References

- 583 [1] L. J. Tranvik, J. a. Downing, J. B. Cotner, S. a. Loiselle, R. G. Striegl,  
584 T. J. Ballatore, P. Dillon, K. Finlay, K. Fortino, L. B. Knoll, Lakes and  
585 reservoirs as regulators of carbon cycling and climate, *Limnology and*  
586 *Oceanography* 54 (2009) 2298–2314.
- 587 [2] W. E. &. G. Dean E., Magnitude and Significance of Carbon Burial in  
588 Lakes, Reservoirs, and Peatlands, *Geology* 26 (1998) 535–538.
- 589 [3] D. Bastviken, L. J. Tranvik, J. A. Downing, P. M. Crill, A. Enrich-  
590 Prast, Freshwater Methane Emissions Offset the Continental Carbon  
591 Sink, *Science* 331 (2011) 50–50.
- 592 [4] H. Fischer, A. Sachse, C. E. W. Steinberg, M. Pusch, Differential re-  
593 tention and utilization of dissolved organic carbon by bacteria in river  
594 sediments, *Limnology and Oceanography* 47 (2002) 1702–1711.
- 595 [5] A. L. Haglund, P. Lantz, E. Törnblom, L. Tranvik, Depth distribu-  
596 tion of active bacteria and bacterial activity in lake sediment, *FEMS*  
597 *Microbiology Ecology* 46 (2003) 31–38.
- 598 [6] K. H. Nealson, SEDIMENT BACTERIA: Who’s There, What Are They  
599 Doing, and What’s New?, *Annu. Rev. Earth Planet. Sci* 25 (1997) 403–  
600 34.
- 601 [7] J. P. Megonigal, M. E. Hines, P. T. Visscher, Anaerobic  
602 Metabolism: Linkages to Trace Gases and Aerobic Processes, in: *Bio-*  
603 *geochemistry*, Elsevier, Oxford, 2004, pp. 317–424.
- 604 [8] M. Maerki, B. Muller, C. Dinkel, B. Wehrli, Mineralization pathways in  
605 lake sediments with different oxygen and organic carbon supply, *Lim-*  
606 *nology and Oceanography* 54 (2009) 428.

- 607 [9] E. D. Melton, E. D. Swanner, S. Behrens, C. Schmidt, A. Kappler, The  
608 interplay of microbially mediated and abiotic reactions in the biogeo-  
609 chemical Fe cycle, *Nature Reviews Microbiology* 12 (2014) 797–808.
- 610 [10] K. Frindte, M. Allgaier, H.-P. Grossart, W. Eckert, Microbial Response  
611 to Experimentally Controlled Redox Transitions at the Sediment Water  
612 Interface, *PLOS ONE* 10 (2015) e0143428.
- 613 [11] K. G. Lloyd, L. Schreiber, D. G. Petersen, K. U. Kjeldsen, M. a. Lever,  
614 A. D. Steen, R. Stepanauskas, M. Richter, S. Kleindienst, S. Lenk,  
615 A. Schramm, B. B. Jørgensen, Predominant archaea in marine sedi-  
616 ments degrade detrital proteins., *Nature* 496 (2013) 215–8.
- 617 [12] I. Miskin, G. Rhodes, K. Lawlor, J. R. Saunders, R. W. Pickup, Bacteria  
618 in post-glacial freshwater sediments, *Microbiology* 144 (1998) 2427–  
619 2439.
- 620 [13] S. Li, X. Xiao, X. Yin, F. Wang, Bacterial community along a historic  
621 lake sediment core of Ardley Island, west Antarctica., *Extremophiles :*  
622 *life under extreme conditions* 10 (2006) 461–7.
- 623 [14] W. Ye, X. Liu, S. Lin, J. Tan, J. Pan, D. Li, H. Yang, The vertical distri-  
624 bution of bacterial and archaeal communities in the water and sediment  
625 of Lake Taihu, *FEMS Microbiology Ecology* 70 (2009) 263–276.
- 626 [15] A. Vuillemin, D. Ariztegui, Geomicrobiological investigations in sub-  
627 saline maar lake sediments over the last 1500 years, *Quaternary Science*  
628 *Reviews* 71 (2013) 119–130.
- 629 [16] W. Xiong, P. Xie, S. Wang, Y. Niu, X. Yang, W. Chen, Sources of  
630 organic matter affect depth-related microbial community composition  
631 in sediments of Lake Erhai, Southwest China, *Journal of Limnology* 74  
632 (2015) 310–323.
- 633 [17] S. Spring, R. Schulze, J. Overmann, K. H. Schleifer, Identification and  
634 characterization of ecologically significant prokaryotes in the sediment of  
635 freshwater lakes: Molecular and cultivation studies, *FEMS Microbiology*  
636 *Reviews* 24 (2000) 573–590.

- 637 [18] C. Bri  e, D. Moreira, P. Lopez-Garc  a, Archaeal and bacterial com-  
638 munity composition of sediment and plankton from a suboxic freshwater  
639 pond, *Research in Microbiology* 158 (2007) 213–227.
- 640 [19] K. G. Lloyd, M. K. May, R. T. Kevorkian, A. D. Steen, Meta-analysis  
641 of quantification methods shows that archaea and bacteria have similar  
642 abundances in the subseafloor, *Applied and Environmental Microbiology*  
643 79 (2013) 7790–7799.
- 644 [20] G. Borrel, A. C. Lehours, O. Crouzet, D. J  z  quel, K. Rockne, A. Kul-  
645 czak, E. Duffaud, K. Joblin, G. Fonty, Stratification of Archaea in  
646 the deep sediments of a freshwater meromictic lake: Vertical shift from  
647 methanogenic to uncultured Archaeal lineages, *PLoS ONE* 7 (2012) 8.
- 648 [21] J. Zhang, Y. Yang, L. Zhao, Y. Li, S. Xie, Y. Liu, Distribution of  
649 sediment bacterial and archaeal communities in plateau freshwater lakes,  
650 *Applied Microbiology and Biotechnology* 99 (2015) 3291–3302.
- 651 [22] T. Rodrigues, E. Cat  o, M. M. C. Bustamante, B. F. Quirino, R. H.  
652 Kruger, C. M. Kyaw, Seasonal effects in a lake sediment archaeal com-  
653 munity of the Brazilian Savanna., *Archaea (Vancouver, B.C.)* 2014  
654 (2014) 957145.
- 655 [23] R. G  chter, J. S. Meyer, A. Mares, Contribution of bacteria to release  
656 and fixation of phosphorus in lake sediments, *Limnology and Oceanog-*  
657 *raphy* 33 (1988) 1542–1558.
- 658 [24] O. C. Chan, P. Claus, P. Casper, A. Ulrich, T. Lueders, R. Conrad, Ver-  
659 tical distribution of structure and function of the methanogenic archaeal  
660 community in Lake Dagow sediment, *Environmental Microbiology* 7  
661 (2005) 1139–1149.
- 662 [25] P. N. Polymenakou, G. Fragkioudaki, A. Tselepides, Bacterial and or-  
663 ganic matter distribution in the sediments of the Thracian Sea (NE  
664 Aegean Sea), *Continental Shelf Research* 27 (2007) 2187–2197.
- 665 [26] B. A. Lomstein, A. T. Langerhuus, S. D’Hondt, B. B. J  rgensen,  
666 A. J. Spivack, Endospore abundance, microbial growth and necromass  
667 turnover in deep sub-seafloor sediment, *Nature* 484 (2012) 101–104.



- 668 [27] S. Xie, J. S. Lipp, G. Wegener, T. G. Ferdelman, K.-u. Hinrichs,  
669 Turnover of microbial lipids in the deep biosphere and growth of benthic  
670 archaeal populations., *Proceedings of the National Academy of Sciences*  
671 *of the United States of America* 110 (2013) 6010–4.
- 672 [28] T. M. Hoehler, B. B. Jørgensen, Microbial life under extreme energy  
673 limitation., *Nature reviews. Microbiology* 11 (2013) 83–94.
- 674 [29] A. Baselga, Partitioning the turnover and nestedness components of  
675 beta diversity, *Global Ecology and Biogeography* 19 (2010) 134–143.
- 676 [30] C. Corinaldesi, F. Beolchini, A. Dell’Anno, Damage and degradation  
677 rates of extracellular DNA in marine sediments: Implications for the  
678 preservation of gene sequences, *Molecular Ecology* 17 (2008) 3939–3951.
- 679 [31] T. Wunderlin, J. P. Corella, T. Junier, M. Bueche, J. L. Loizeau, S. Gi-  
680 rardclos, P. Junier, Endospore-forming bacteria as new proxies to assess  
681 impact of eutrophication in Lake Geneva (Switzerland-France), *Aquatic*  
682 *Sciences* 76 (2014) 103–116.
- 683 [32] P. A. Meyers, R. Ishiwatari, Lacustrine organic geochemistry - an  
684 overview of indicators of organic-matter sources and diagenesis in lake-  
685 sediments, *Organic Geochemistry* 20 (1993) 867–900.
- 686 [33] S. Arndt, B. B. Jørgensen, D. E. LaRowe, J. J. Middelburg, R. D.  
687 Pancost, P. Regnier, Quantifying the degradation of organic matter in  
688 marine sediments: A review and synthesis, *Earth-science reviews* 123  
689 (2013) 53–86.
- 690 [34] D. M. McKnight, E. W. Boyer, P. K. Westerhoff, P. T. Doran, T. Kulbe,  
691 D. T. Andersen, Spectrofluorometric characterization of dissolved or-  
692 ganic matter for indication of precursor organic material and aromatic-  
693 ity, *Limnology and Oceanography* 46 (2001) 38–48.
- 694 [35] P. Legendre, Interpreting the replacement and richness difference com-  
695 ponents of beta diversity, *Global Ecology and Biogeography* 23 (2014)  
696 1324–1334.
- 697 [36] J. Comte, E. S. Lindström, A. Eiler, S. Langenheder, Can marine bacte-  
698 ria be recruited from freshwater sources and the air?, *The ISME journal*  
699 8 (2014) 1–8.

- 700 [37] D. G. Capone, R. P. Kiene, Comparison of microbial dynamics in marine  
701 and freshwater sediments: Contrasts in anaerobic carbon catabolism.,  
702 *Limnology and Oceanography* 33 (1988) 725–749.
- 703 [38] G. M. Luna, C. Corinaldesi, E. Rastelli, R. Danovaro, Patterns and  
704 drivers of bacterial alpha- and beta-diversity across vertical profiles from  
705 surface to subsurface sediments, *Environmental Microbiology Reports*  
706 5 (2013) 731–739.
- 707 [39] S. L. Jørgensen, B. Hannisdal, A. Lanzén, T. Baumberger, K. Flesland,  
708 R. Fonseca, L. Ovreås, I. H. Steen, I. H. Thorseth, R. B. Pedersen,  
709 C. Schleper, Correlating microbial community profiles with geochemical  
710 data in highly stratified sediments from the Arctic Mid-Ocean Ridge.,  
711 *Proceedings of the National Academy of Sciences of the United States*  
712 *of America* 109 (2012) E2846–55.
- 713 [40] Y. Koizumi, H. Kojima, M. Fukui, Characterization of depth-related  
714 microbial community structure in lake sediment by denaturing gradient  
715 gel electrophoresis of amplified 16S rDNA and reversely transcribed 16S  
716 rRNA fragments, *FEMS Microbiology Ecology* 46 (2003) 147–157.
- 717 [41] H. Sass, H. Cypionka, H.-D. Babenzien, Vertical distribution of sulfate-  
718 reducing bacteria at the oxic-anoxic interface in sediments of the oligo-  
719 trophic lake stechlin, *FEMS Microbiology Ecology* 22 (1997) 245–255.
- 720 [42] J. S. Deutzmann, P. Stief, J. Brandes, B. Schink, Anaerobic methane  
721 oxidation coupled to denitrification is the dominant methane sink in a  
722 deep lake., *Proceedings of the National Academy of Sciences of the*  
723 *United States of America* 111 (2014) 18273–8.
- 724 [43] F. Thevenon, N. D. Graham, M. Chiaradia, P. Arpagaus, W. Wildi,  
725 J. Poté, Local to regional scale industrial heavy metal pollution recorded  
726 in sediments of large freshwater lakes in central Europe (lakes Geneva  
727 and Lucerne) over the last centuries, *Science of the Total Environment*  
728 412-413 (2011) 239–247.
- 729 [44] T. Treude, S. Krause, J. Maltby, A. W. Dale, R. Coffin, L. J. Hamdan,  
730 *ScienceDirect* Sulfate reduction and methane oxidation activity below  
731 the sulfate-methane transition zone in Alaskan Beaufort Sea continental

- margin sediments : Implications for deep sulfur cycling, *Geochimica et Cosmochimica Acta* 144 (2014) 217–237.
- [45] R. Conrad, P. Claus, P. Casper, Characterization of stable isotope fractionation during methane production in the sediment of a eutrophic lake, Lake Dagow, Germany, *Limnology and Oceanography* 54 (2009) 457–471.
- [46] D. R. Lovley, J. D. Coates, E. L. Blunt-Harris, E. J. P. Phillips, J. C. Woodward, Humic substances as electron acceptors for microbial respiration, *Nature* 382 (1996) 445–448.
- [47] I. C. Torres, K. S. Inglett, K. R. Reddy, Heterotrophic microbial activity in lake sediments: Effects of organic electron donors, *Biogeochemistry* 104 (2011) 165–181.
- [48] C. Glombitza, M. Stockhecke, C. J. Schubert, A. Vetter, J. Kallmeyer, Sulfate reduction controlled by organic matter availability in deep sediment cores from the saline, alkaline lake van (Eastern Anatolia, Turkey), *Frontiers in Microbiology* 4 (2013) 209.
- [49] R. J. Parkes, B. Cragg, E. Roussel, G. Webster, A. Weightman, H. Sass, A review of prokaryotic populations and processes in sub-seafloor sediments, including biosphere: Geosphere interactions, *Marine Geology* 352 (2014) 409–425.
- [50] G. M. Luna, E. Manini, R. Danovaro, Large Fraction of Dead and Inactive Bacteria in Coastal Marine Sediments: Comparison of Protocols for Determination and Ecological Significance, *Applied and Environmental Microbiology* 68 (2002) 3509–3513.
- [51] R. Danovaro, A. Dell’Anno, C. Corinaldesi, M. Magagnini, R. Noble, C. Tamburini, M. Weinbauer, Major viral impact on the functioning of benthic deep-sea ecosystems., *Nature* 454 (2008) 1084–1087.
- [52] T. Engelhardt, J. Kallmeyer, H. Cypionka, B. Engelen, High virus-to-cell ratios indicate ongoing production of viruses in deep subsurface sediments., *The ISME journal* 8 (2014) 1–7.

- 762 [53] A. Dell'Anno, C. Corinaldesi, R. Danovaro, Virus decomposition pro-  
763 vides an important contribution to benthic deep-sea ecosystem func-  
764 tioning., *Proceedings of the National Academy of Sciences* 112 (2015)  
765 E2014–E2019.
- 766 [54] P. P. Kandel, Z. Pasternak, J. van Rijn, O. Nahum, E. Jurkevitch, Abun-  
767 dance, diversity and seasonal dynamics of predatory bacteria in aqua-  
768 culture zero discharge systems, *FEMS Microbiology Ecology* 89 (2014)  
769 149–161.
- 770 [55] A. Fuchs, G. B. Selmeczy, P. Kasprzak, J. Padisák, P. Casper, Coin-  
771 cidence of sedimentation peaks with diatom blooms, wind, and calcite  
772 precipitation measured in high resolution by a multi-trap, *Hydrobiologia*  
773 763 (2016) 329–344.
- 774 [56] I. Domaizon, O. Savichtcheva, D. Debroas, F. Arnaud, C. Villar, C. Pig-  
775 nol, B. Alric, M. E. Perga, DNA from lake sediments reveals the long-  
776 term dynamics and diversity of *Synechococcus* assemblages,  
777 *Biogeosciences Discussions* 10 (2013) 2515–2564.
- 778 [57] E. Capo, D. Debroas, F. Arnaud, I. Domaizon, Is Planktonic Diversity  
779 Well Recorded in Sedimentary DNA? Toward the Reconstruction of Past  
780 Protistan Diversity, *Microbial Ecology* 70 (2015) 865–875.
- 781 [58] E. A. Gies, K. M. Konwar, J. Thomas Beatty, S. J. Hallam, Illuminat-  
782 ing microbial dark matter in meromictic Sakinaw Lake, *Applied and*  
783 *Environmental Microbiology* 80 (2014) 6807–6818.
- 784 [59] L. Adrian, U. Szewzyk, J. Wecke, H. Görisch, Bacterial dehalorespira-  
785 tion with chlorinated benzenes., *Nature* 408 (2000) 580–583.
- 786 [60] M. Ferrer, M. E. Guazzaroni, M. Richter, A. García-Salamanca,  
787 P. Yarza, A. Suárez-Suárez, J. Solano, M. Alcaide, P. van Dillewijn,  
788 M. A. Molina-Henares, N. López-Cortés, Y. Al-Ramahi, C. Guerrero,  
789 A. Acosta, L. I. de Eugenio, V. Martínez, S. Marques, F. Rojo, E. San-  
790 tero, O. Genilloud, J. Pérez-Pérez, R. Rosselló-Móra, J. L. Ramos, Tax-  
791 onomic and Functional Metagenomic Profiling of the Microbial Commu-  
792 nity in the Anoxic Sediment of a Sub-saline Shallow Lake (Laguna de  
793 Carrizo, Central Spain), *Microbial Ecology* 62 (2011) 824–837.

- 794 [61] A. Hiraishi, Biodiversity of dehalorespiring bacteria with special em-  
795 phasis on polychlorinated biphenyl/dioxin dechlorinators, *Microbes and*  
796 *Environments* 23 (2008) 1–12.
- 797 [62] L. a. Hug, C. J. Castelle, K. C. Wrighton, B. C. Thomas, I. Sharon, K. R.  
798 Frischkorn, K. H. Williams, S. G. Tringe, J. F. Banfield, Community  
799 genomic analyses constrain the distribution of metabolic traits across  
800 the Chloroflexi phylum and indicate roles in sediment carbon cycling.,  
801 *Microbiome* 1 (2013) 22.
- 802 [63] K. B. Sørensen, A. Teske, Stratified Communities of Active Archaea  
803 in Deep Marine Subsurface Sediments Stratified Communities of Active  
804 Archaea in Deep Marine Subsurface Sediments, *Appl Environ Microbiol*  
805 72 (2006) 4596–4603.
- 806 [64] P. N. Evans, D. H. Parks, G. L. Chadwick, S. J. Robbins, V. J. Orphan,  
807 S. D. Golding, G. W. Tyson, Methane metabolism in the archaeal phy-  
808 lum Bathyarchaeota revealed by genome-centric metagenomics., *Science*  
809 (New York, N.Y.) 350 (2015) 434–8.
- 810 [65] V. V. Kadnikov, A. V. Mardanov, A. V. Beletsky, O. V. Shubenkova,  
811 T. V. Pogodaeva, T. I. Zemskaya, N. V. Ravin, K. G. Skryabin, Mi-  
812 crobial community structure in methane hydrate-bearing sediments of  
813 freshwater Lake Baikal, *FEMS Microbiology Ecology* 79 (2012) 348–358.
- 814 [66] B. J. Baker, L. R. Comolli, G. J. Dick, L. J. Hauser, D. Hyatt, B. D. Dill,  
815 M. L. Land, N. C. VerBerkmoes, R. L. Hettich, J. F. Banfield, Enig-  
816 matic, ultrasmall, uncultivated Archaea, *Proceedings of the National*  
817 *Academy of Sciences* 107 (2010) 8806–8811.
- 818 [67] Y. Koizumi, S. Takii, M. Nishino, T. Nakajima, Vertical distributions  
819 of sulfate-reducing bacteria and methane-producing archaea quantified  
820 by oligonucleotide probe hybridization in the profundal sediment of a  
821 mesotrophic lake, *FEMS Microbiology Ecology* 44 (2003) 101–108.
- 822 [68] J. I. K. Schwarz, W. Eckert, R. Conrad, Community structure of Ar-  
823 chaea and Bacteria in a profundal lake sediment Lake Kinneret (Israel),  
824 *Systematic and Applied Microbiology* 30 (2007) 239–254.

- 825 [69] E. V. Koonin, Y. I. Wolf, Genomics of bacteria and archaea: The  
826 emerging dynamic view of the prokaryotic world, *Nucleic Acids Research*  
827 36 (2008) 6688–6719.
- 828 [70] F. E. Angly, P. G. Dennis, A. Skarszewski, I. Vanwonterghem, P. Hugenholtz,  
829 G. W. Tyson, CopyRighter: a rapid tool for improving the accuracy of microbial community profiles through lineage-specific gene copy  
830 number correction., *Microbiome* 2 (2014) 11.
- 832 [71] A. Spang, J. H. Saw, S. L. Jørgensen, K. Zaremba-Niedzwiedzka, J. Martijn,  
833 A. E. Lind, R. van Eijk, C. Schleper, L. Guy, T. J. Ettema, Complex archaea that bridge the gap between prokaryotes and eukaryotes, *Nature*  
834 521 (2015) 173–179.
- 836 [72] J. Meng, J. Xu, D. Qin, Y. He, X. Xiao, F. Wang, Genetic and functional  
837 properties of uncultivated MCG archaea assessed by metagenome and  
838 gene expression analyses., *The ISME journal* 8 (2014) 650–9.
- 839 [73] K. Kubo, K. G. Lloyd, J. F Biddle, R. Amann, A. Teske, K. Knittel,  
840 Archaea of the Miscellaneous Crenarchaeotal Group are abundant, diverse and widespread in marine sediments, *The ISME Journal* 6 (2012)  
841 1949–1965.
- 843 [74] R. Koschel, D. Adams, An approach to understanding a temperate  
844 oligotrophic lowland lake (lake stechlin, germany), *Archiv fur Hydrobiologie, Special Issues Advanced Limnology* 58 (2003) 1–9.
- 846 [75] R. H. Hesslein, An in situ sampler for close interval pore water studies,  
847 *Limnology and Oceanography* 21 (1976) 912–914.
- 848 [76] R. N. Glud, Oxygen dynamics of marine sediments, *Marine Biology Research* 4 (2008) 243–289.
- 850 [77] P. Casper, M. Bianchi, H. Muntau, Spatial and temporal variations of  
851 heavy metals in the sediments of Lake Stechlin (Germany), *Limnologica*  
852 25 (1995) 301–309.
- 853 [78] N. Buesing, M. O. Gessner, Incorporation of radiolabeled leucine into  
854 protein to estimate bacterial production in plant litter, sediment, epiphytic biofilms, and water samples, *Microbial Ecology* 45 (2003) 291–  
855 301.
- 856

- 857 [79] K. Attermeyer, K. Premke, T. Hornick, S. Hilt, H.-P. Grossart,  
858 Ecosystem-level studies of terrestrial carbon reveal contrasting bacterial  
859 metabolism in different aquatic habitats, *Ecology* 94 (2013) 2754–2766.
- 860 [80] F. Azam, M. Simon, Protein content and protein synthesis rates of  
861 planktonic marine bacteria, *Marine ecology progress series* 51 (1989)  
862 213, 201.
- 863 [81] D. L. Kirchman, Leucine Incorporation as a Measure of Biomass Pro-  
864 duction by Heterotrophic Bacteria, *Handbook of Methods in Aquatic*  
865 *Microbial Ecology* (1993) 509–512.
- 866 [82] O. Nercessian, E. Noyes, M. G. Kalyuzhnaya, M. E. Lidstrom, L. Chis-  
867 toserdova, Bacterial Populations Active in Metabolism of C 1 Com-  
868 pounds in the Sediment of Lake Washington , a Freshwater Lake Bac-  
869 terial Populations Active in Metabolism of C 1 Compounds in the Sedi-  
870 ment of Lake Washington , a Freshwater Lake, *Society* 71 (2005) 6885–  
871 6899.
- 872 [83] A. Engelbrektson, V. Kunin, K. C. Wrighton, N. Zvenigorodsky,  
873 F. Chen, H. Ochman, P. Hugenholtz, Experimental factors affecting  
874 PCR-based estimates of microbial species richness and evenness., *The*  
875 *ISME journal* 4 (2010) 642–647.
- 876 [84] F. Hlker, C. Wurzbacher, C. Weißenborn, M. T. Monaghan, S. I. J.  
877 Holzhauer, K. Premke, Microbial diversity and community respiration in  
878 freshwater sediments influenced by artificial light at night, *Philosophical*  
879 *transactions of the Royal Society of London. Series B, Biological sciences*  
880 370 (2015) 10.
- 881 [85] E. Pruesse, J. Peplies, F. O. Glöckner, SINA: accurate high throughput  
882 multiple sequence alignment of ribosomal RNA genes, *Bioinformatics*  
883 28 (2012) 1823–1829.
- 884 [86] C. Quast, E. Pruesse, P. Yilmaz, J. Gerken, T. Schweer, P. Yarza,  
885 J. Peplies, F. Glöckner, The SILVA ribosomal RNA gene database  
886 project: improved data processing and web-based tools, *Nucleic Acids*  
887 *Research* 41 (2013) D590–6.
- 888 [87] J. Oksanen, *Vegan: Community ecology package*, R package version 2  
889 (2013).



- 890 [88] D. W. Roberts, Statistical analysis of multidimensional fuzzy set ordi-  
891 nations, *Ecology* 89 (2008) 1246–1260.
- 892 [89] J. C. Carvalho, P. Cardoso, P. Gomes, Determining the relative roles of  
893 species replacement and species richness differences in generating beta-  
894 diversity patterns, *Global Ecology and Biogeography* 21 (2012) 760–771.

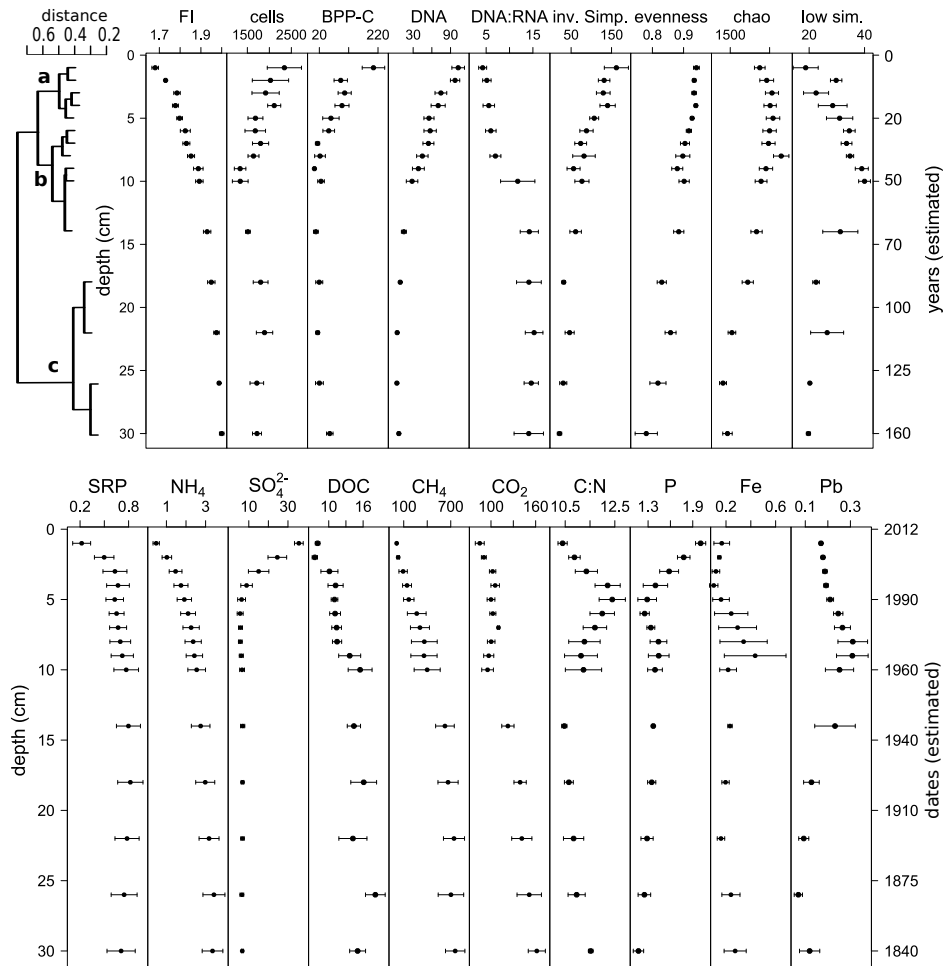

Figure 1: Depth profiles of a reduced set of sediment variables of Lake Stechlin at 30 m depth presented as the mean with standard error. The cluster dendrogram (average clustering) to the left presents the similarity of the total microbial community of each sampling depth and identifies the three depth horizons. A detailed version of all measured variables per individual core can be found in the supplemental material. Age values were adopted from <sup>137</sup>Cs measurements. Units: cells [ $10^6 ml^{-1}$ ]; BPP-C/bacterial protein production in Carbon [ $\mu g \cdot ml^{-1} d^{-1}$ ]; DNA [ $ng$ ]; low sim. [% of sequences]; SRP [ $mg \cdot l^{-1}$ ]; NH<sub>4</sub> [ $mg \cdot l^{-1}$ ]; SO<sub>4</sub><sup>2-</sup> [ $mg \cdot l^{-1}$ ]; DOC [ $mg \cdot l^{-1}$ ]; CH<sub>4</sub> [ $\mu mol \cdot l^{-1}$ ]; CO<sub>2</sub> [ $mmol \cdot l^{-1}$ ]; P [ $mg \cdot g^{-1}$  dry weight]; Fe [ $mg \cdot g^{-1}$  dry weight]; Pb [ $mg \cdot g^{-1}$  dry weight]

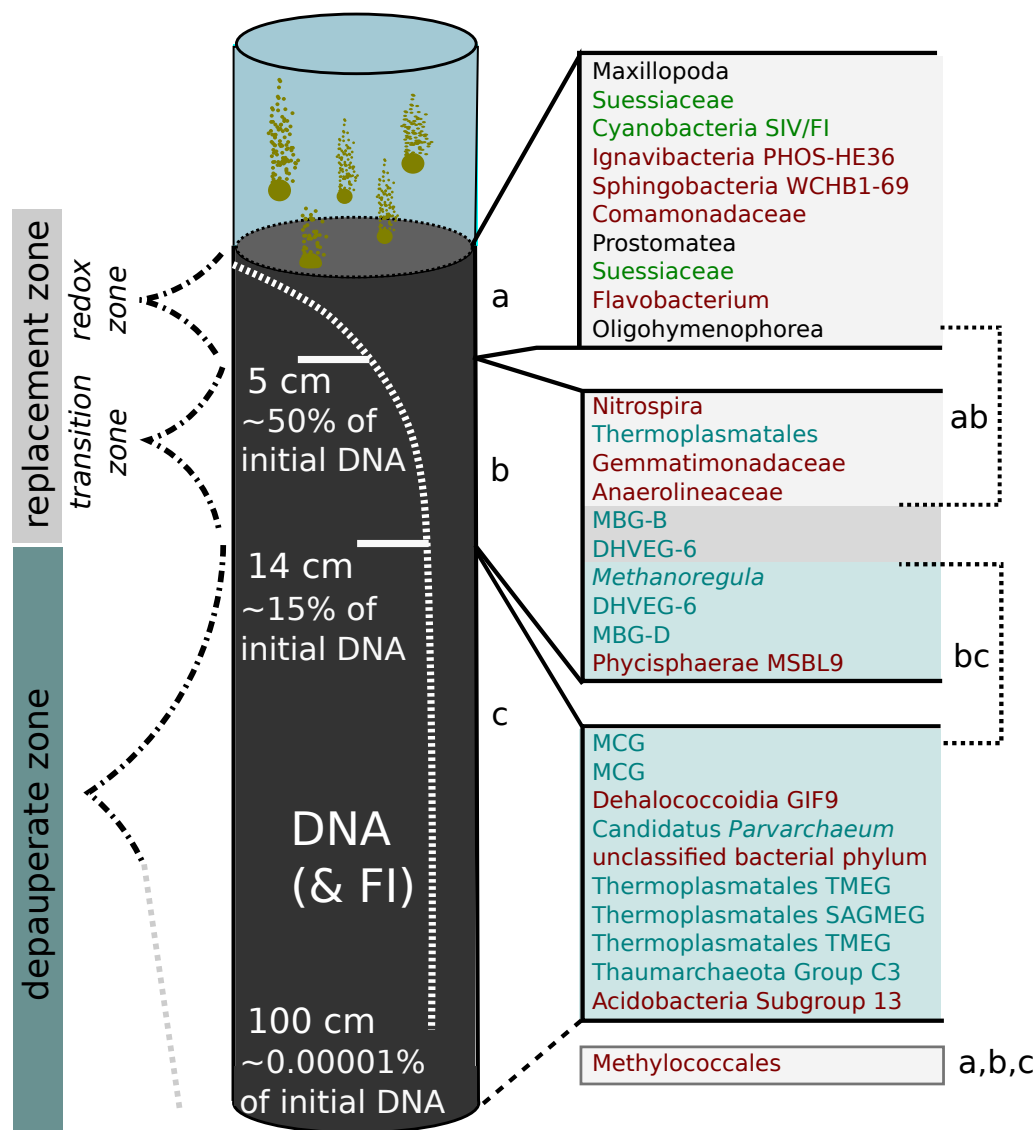

Figure 2: Overview on Lake Stechlin's sediment structure. The cluster analysis separates three depth horizons: The *redox-stratified zone* (0 – 5 cm), which includes a thin layer of oxygen. A few fauna species exist in this zone, i.e., Nematoda, Gastrotricha, and microeukaryotes (e.g., Ciliophora), in addition to large numbers of highly active bacteria. Below 5 cm, where 50% of the DNA is already decomposed, the system enters the *transition zone*. This zone is situated below the sulfate-methane transition. Below 14 cm, we find the *depauperate zone*, which extends in the deeper sediment, in which archaea dominate the community. In an extrapolation of the richness component of the community structure, the loss of richness would completely dominate (100%) the microbial community at 1 m depth (approx. 500 a). Following the decay curve of the DNA, 99.99999% of the DNA would be transformed at that depth.<sup>32</sup> On the right side, the 10 most structuring OTUs (from Fig. S4) are listed, which were significantly elevated in the corresponding horizon (only results with  $p < 0.01$  in the TukeyHSD PostHoc Test, were included). The brackets ab and bc mark those OTUs that were elevated in the upper two or lower two zones, respectively. Only two OTUs were elevated in the transition zone. The grey box marks the single taxon that was significantly different in all three horizons. Taxon names are color coded according to their classification or phototrophy if applicable: phototrophic organism (green), eukaryotes (black), bacteria (red), archaea (blue).

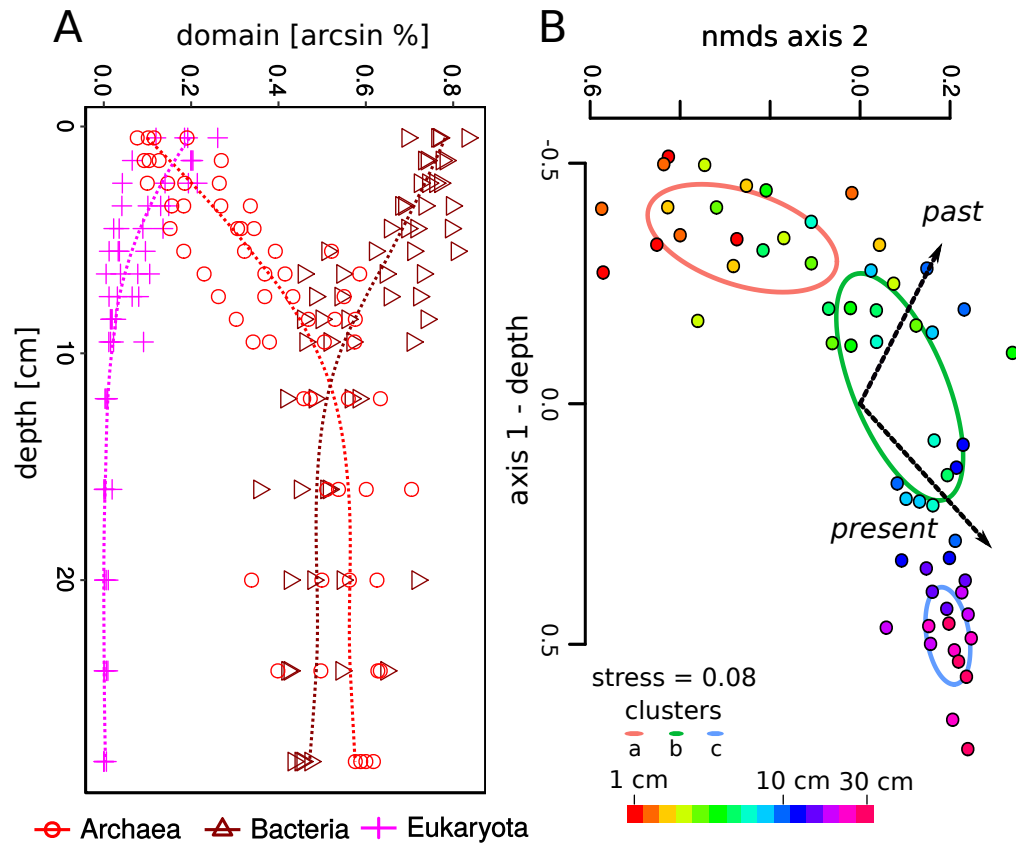

Figure 3: A. Depth profiles of the microbial community (eukarya, bacteria, and archaea) presented as relative proportions to each other, which was determined by relative pyrosequencing reads per microbial fraction. B. NMDS ordination of the vertical sediment microbial community structure. The clusters from Fig. 1 are presented as standard deviation around the group centroid. The color scale of the dots represents sediment depth.
